# Supplementary material for: Involvement of Peripheral Monocytes with IL-1β in the Pathogenesis of West Syndrome
Source: MDPI journal article supplement (doi:10.3390/jcm11020447), 2022-01-16
Supplement: s1 [file s1]

## Supplementary Materials

**Table S1.** Examination parameters for intracellular cytokines and plasma cytokine/chemokines.

### 1.1 Flow cytometry analysis

| Molecule                                     | Color        | Clone    | Isotype        | Supplier    |
|----------------------------------------------|--------------|----------|----------------|-------------|
| Lineage markers (Cell-surface staining)      |              |          |                |             |
| CD3                                          | PerCP-Cy5.5  | 17A2     | Rat IgG2b, κ   | BioLegend   |
| CD4                                          | PE-Cy7       | A161A1   | Rat IgG2b, κ   |             |
| CD8                                          | APC-Cy7      | 53-6.7   | Rat IgG2a, κ   |             |
| CD19                                         | APC-Cy7      | 6D5      | Rat IgG2a, κ   |             |
| CD56                                         | BV510        | HCD56    | Mouse IgG1, κ  |             |
| CD14                                         | PE-Cy7       | 63D3     | Mouse IgG1, κ  |             |
| Activation molecules (Cell-surface staining) |              |          |                |             |
| CD25                                         | FITC         | M-A251   | Mouse IgG1, κ  | BioLegend   |
| CD69                                         | BV510        | FN50     | Mouse IgG1, κ  |             |
| CD86                                         | PerCP-Cy5.5  | BU63     | Mouse IgG1, κ  |             |
| HLA-DR                                       | PE           | L243     | Mouse IgG2a, κ |             |
| CTLA-4                                       | BV421        | BNI3     | Mouse IgG2a, κ |             |
| Cytokines (Intracellular staining)           |              |          |                |             |
| IL-1β                                        | AF647        | JK1B-1   | Mouse IgG1, κ  | BioLegend   |
| IL-1RA                                       | FITC         | CRM17    | Mouse IgG1     | eBioscience |
| IL-6                                         | Pacific Blue | MQ2-13A5 | Rat IgG1, κ    | BioLegend   |
| IL-10                                        | BV421        | JES3-9D7 | Rat IgG1, κ    |             |
| IL-17                                        | PE           | 9B10     | Rat IgG2a, κ   |             |
| IFN-γ                                        | APC          | 4S.B3    | Mouse IgG1, κ  |             |
| TNF-α                                        | BV510        | MAB11    | Mouse IgG1, κ  |             |
| Granzyme A                                   | FITC         | CB9      | Mouse IgG1, κ  |             |
| FoxP3                                        | AF647        | 150D     | Mouse IgG1, κ  |             |

### 1.2 Plasma cytokine/chemokine

|                              |                                                                                                                                 |
|------------------------------|---------------------------------------------------------------------------------------------------------------------------------|
| <b>Th1-related cytokines</b> | <b>IFN-<math>\gamma</math>, TNF-<math>\alpha</math>, IFN-<math>\gamma</math>-inducible protein 10 (IP-10)</b>                   |
| Th2-related cytokines        | IL-4, IL-5, Eotaxin                                                                                                             |
| Th17-related cytokines       | IL-6, IL-8, IL-17, granulocyte colony-stimulating factor (G-CSF), and granulocyte macrophage colony-stimulating factor (GM-CSF) |
| Treg-related cytokine        | IL-10                                                                                                                           |

|        |                                                                                                                                                                                                                                                                                                                                |
|--------|--------------------------------------------------------------------------------------------------------------------------------------------------------------------------------------------------------------------------------------------------------------------------------------------------------------------------------|
| Others | IL-1 $\beta$ , IL-1RA, IL-12, IL-15, basic fibroblast growth factor (FGF-basic), Chemokine ligand (CCL) 2, MCP-1, CCL3 (MIP-1 $\alpha$ ), CCL4 (MIP-1 $\beta$ ), platelet-derived growth factor-bb (PDGF-bb), regulated on activation, normal T expressed and secreted (RANTES), and vascular endothelial growth factor (VEGF) |
|--------|--------------------------------------------------------------------------------------------------------------------------------------------------------------------------------------------------------------------------------------------------------------------------------------------------------------------------------|

**Table S2.** Comparison of intracellular cytokine levels between patients with West syndrome and the control participants.

|                          |               | <b>1</b> | <b>2</b> | <b>3</b> | <b>4</b> | <b>5</b> | <b>6</b> | <b>7</b> | <b>8</b> | <b>9</b> | <b>10</b> | <b>11</b> | <b>12</b> | <b>13</b> |
|--------------------------|---------------|----------|----------|----------|----------|----------|----------|----------|----------|----------|-----------|-----------|-----------|-----------|
| Monocytes                | IL-1 $\beta$  | 4.63     | 3.92     | 4.27     | 2.75     | 6.44     | 16.32    | 59.10    | 15.64    | 19.14    | 6.61      | 1.83      | 39.38     | 6.66      |
|                          | IL-1RA        | 1.01     | 0.28     | 4.72     | 2.92     | 0.49     | 0.03     | 48.82    | 0.52     | 0.42     | 0.28      | 0.34      | 0.10      | 7.57      |
|                          | IL-6          | 0.34     | 0.08     | 0.21     | 0.33     | 0.09     | 0.00     | 1.03     | 0.05     | 0.10     | 0.19      | 0.03      | 0.44      | 0.00      |
|                          | TNF- $\alpha$ | 1.21     | 0.78     | 0.35     | 0.56     | 0.08     | 0.00     | 2.30     | 0.47     | 0.54     | 0.50      | 0.27      | 15.15     | 0.10      |
| CD4 <sup>+</sup> T cells | IFN- $\gamma$ | 0.57     | 1.47     | 0.96     | 0.41     | 0.52     | 0.00     | 0.20     | 0.01     | 0.02     | 0.02      | 0.01      | 1.58      | 0.05      |
|                          | GranzymeA     | 0.32     | 1.16     | 2.67     | 0.76     | 0.39     | 0.00     | 0.20     | 0.13     | 0.35     | 0.58      | 0.50      | 0.72      | 0.16      |
|                          | IL-17         | 0.28     | 1.11     | 5.72     | 0.38     | 0.61     | 0.08     | 0.57     | 0.06     | 0.02     | 0.06      | 0.17      | 0.10      | 0.03      |
|                          | IL-10         | 0.13     | 1.11     | 11.94    | 0.27     | 0.74     | 0.04     | 1.69     | 0.09     | 0.03     | 0.05      | 0.05      | 0.11      | 0.10      |
|                          | IL-1 $\beta$  | 0.13     | 0.21     | 0.30     | 0.02     | 0.47     | 0.35     | 0.34     | 0.34     | 0.85     | 0.82      | 0.17      | 0.04      | 0.20      |
|                          | IL-1RA        | 0.72     | 0.33     | 0.43     | 0.26     | 0.10     | 3.96     | 6.19     | 1.02     | 2.01     | 1.13      | 6.20      | 0.04      | 1.01      |
|                          | IL-6          | 0.26     | 0.07     | 0.38     | 0.25     | 0.01     | 0.00     | 0.08     | 0.02     | 0.02     | 0.01      | 0.01      | 0.07      | 0.00      |
|                          | TNF- $\alpha$ | 0.16     | 0.42     | 1.72     | 0.61     | 0.09     | 0.00     | 0.08     | 0.02     | 0.02     | 0.01      | 0.01      | 0.07      | 0.00      |
|                          | IFN- $\gamma$ | 20.77    | 15.33    | 7.34     | 5.81     | 0.21     | 0.01     | 1.15     | 0.12     | 0.12     | 0.06      | 0.00      | 0.64      | 0.04      |
|                          | Granzyme A    | 0.51     | 0.40     | 6.76     | 1.85     | 0.65     | 0.01     | 16.47    | 0.19     | 0.27     | 0.93      | 0.29      | 0.17      | 0.15      |
| CD8 <sup>+</sup> T cells | IL-17         | 0.08     | 0.36     | 5.03     | 0.10     | 0.18     | 0.03     | 0.30     | 0.01     | 0.01     | 0.00      | 0.07      | 0.02      | 0         |
|                          | IL-10         | 0.09     | 0.31     | 5.46     | 0.08     | 0.20     | 0.01     | 2.36     | 0.02     | 0.02     | 0.03      | 0.04      | 0.04      | 0.01      |
|                          | IL-1 $\beta$  | 0.15     | 0.38     | 1.42     | 1.92     | 0.81     | 0.69     | 0.34     | 0.16     | 0.47     | 0.16      | 0.07      | 0.35      | 0.03      |
|                          | IL-1RA        | 1.56     | 1.07     | 0.59     | 0.41     | 0.23     | 0.23     | 0.10     | 0.65     | 1.50     | 1.34      | 1.19      | 0.00      | 0.19      |
|                          | IL-6          | 8.94     | 6.39     | 0.24     | 0.14     | 0.02     | 0.00     | 0.02     | 0.00     | 0.02     | 0.06      | 0.00      | 0.00      | 0.00      |
|                          | TNF- $\alpha$ | 0.02     | 0.04     | 2.66     | 1.16     | 0.04     | 0.00     | 0.16     | 0.00     | 0.07     | 0.06      | 0.00      | 0.03      | 0.00      |
|                          | IFN- $\gamma$ | 0.00     | 0.01     | 0.02     | 0.00     | 0.00     | 0.00     | 0.00     | 0.00     | 0.00     | 0.00      | 0.00      | 0.00      | 0.00      |
| NKT-like cells           | Granzyme A    | 0.01     | 0.00     | 0.03     | 0.04     | 0.02     | 0.00     | 0.08     | 0.01     | 0.03     | 0.14      | 0.08      | 0.00      | 0.00      |
| NK cells                 | IFN- $\gamma$ | 9.42     | 2.50     | 0.00     | 0.00     | 0.00     | 0.00     | 0.02     | 0.00     | 0.00     | 0.00      | 0.00      | 0.00      | 0.00      |
|                          | Granzyme A    | 10.17    | 4.21     | 0.03     | 0.04     | 0.00     | 0.00     | 0.04     | 0.00     | 0.07     | 0.69      | 0.23      | 0.16      | 0.00      |
| B cells                  | IFN- $\gamma$ | 0.01     | 0.00     | 0.02     | 0.04     | 2.00     | 0.07     | 0.04     | 0.01     | 0.00     | 0.01      | 0.00      | 0.00      | 0.24      |
|                          | Granzyme A    | 0.82     | 0.21     | 0.15     | 1.89     | 1.24     | 0.00     | 4.54     | 0.16     | 0.31     | 0.46      | 0.62      | 0.02      | 0.15      |

**Table S3.** Plasma cytokine/chemokine concentrations of patients with West syndrome and control group participants.

|               | (pg/ml)                | West syndrome group |                 | Control group |                   | P-value |
|---------------|------------------------|---------------------|-----------------|---------------|-------------------|---------|
| <b>Th1</b>    | IFN- $\gamma$          | 11.04               | (9.37–76.01)    | 12.1          | (8.1–28.7)        | 1.00    |
|               | TNF- $\alpha$          | 18.12               | (4.26–63.83)    | 31.27         | (8.08–44.94)      | 0.96    |
|               | IP-10                  | 269.64              | (157.97–435.02) | 2917.3        | (295.06–11456.77) | 0.10    |
|               | IL-2                   | 4.06                | (2.69–7.86)     | 3.52          | (0.91–4.13)       | 0.28    |
| <b>Th 2</b>   | IL-4                   | 1.83                | (1.48–2.72)     | 1.27          | (0.7–2.18)        | 0.83    |
|               | IL-5                   | 36.0                | (18.3–62.0)     | 19.91         | (0.6–40.78)       | 0.64    |
|               | Eotaxin                | 52.11               | (36.38–65.24)   | 303.18        | (64.28–806.55)    | 0.37    |
| <b>Th 17</b>  | IL-6                   | 3.04                | (2.58–17.03)    | 3.96          | (3.78–14.08)      | 0.03    |
|               | IL-8                   | 10.73               | (7.13–1745.25)  | 6.79          | (5.30–18.31)      | 0.76    |
|               | IL-17                  | 4.51                | (3.12–8.97)     | 6.65          | (3.07–10.88)      | 1.00    |
|               | G-CSF                  | 87.06               | (70.79–804.06)  | 70.6          | (20.02–103.79)    | 0.58    |
|               | GM-CSF                 | 0.84                | (0.32–2.28)     | 1.41          | (0.4–6.055)       | 0.96    |
| <b>Treg</b>   | IL-10                  | 6.12                | (4.71–6.40)     | 7.68          | (2.73–10.19)      | 0.15    |
| <b>Others</b> | IL-1 $\beta$           | 0.71                | (0.53–11.53)    | 0.75          | (0.53–1.11)       | 0.63    |
|               | IL-1RA                 | 409.6               | (377.29–1804.2) | 293.93        | (25.15–1070.17)   | 0.18    |
|               | IL-12                  | 2.48                | (1.89–4.56)     | 2.74          | (2.09–4.00)       | 0.10    |
|               | IL-15                  | 254.03              | (184.36–291.81) | 259.4         | (0.00–309.37)     | 0.72    |
|               | FGF basic              | 30.45               | (21.86–63.29)   | 29.8          | (6.67–37.0)       | 1.00    |
|               | CCL2 (MCP-1)           | 119.64              | (84.75–664.79)  | 49.1          | (35.63–81.40)     | 0.64    |
|               | CCL3 (MIP-1 $\alpha$ ) | 0.85                | (0.78–58.9)     | 0.71          | (0.4–0.87)        | 0.96    |
|               | CCL4 (MIP-1 $\beta$ )  | 146.76              | (128.77–845.47) | 125.3         | (37.4–168.24)     | 0.70    |
|               | PDGF-BB                | 383.42              | (283.77–813.76) | 52.988        | (222.63–1236.25)  | 0.64    |
|               | RANTES                 | 8436.94             | (5442.4–8603.1) | 3257.77       | (2020.7–8216.72)  | 0.72    |
|               | VEGF                   | 441.64              | (387.97–481.94) | 438.75        | (22.11–503.54)    | 0.18    |
